# Supplementary material
Source: Research Square preprint supplement (doi:10.21203/rs.3.rs-9593874/v1)
Supplement: Supplementary file 1 [file b332fbfeaaf635e1a1d0309d.docx]

**Additional file 1**. **English-language version of the questionnaire-guided anamnesis**

| This document is an English-language rendering of the relevant sections of the Spanish BioICOPER study-specific interviewer-administered form used to collect participant sociodemographic data, COVID-19-episode information, persistent symptoms, and selected medical history variables relevant to o Long COVID (LC) and Chronic Fatigue Syndrome (CFS), and selected medical history and medication variables relevant to the present manuscript. Sections and items not used for the current manuscript, including unrelated clinical tests and copyrighted or previously published standardized questionnaires, have been omitted from this supplementary file. |
| --- |

1. **Sociodemographic variables retained for the present analysis**

| **Variable** | **Response / recording field** |
| --- | --- |
| **Date of birth** | ____ / ____ / ______ |
| **Age** | ________ years |
| **Sex** | [ ] Male [ ] Female |

1. **COVID-19 diagnosis and infection history**

| For the present manuscript, the date of the acute SARS-CoV-2 infection associated with the onset of persistent symptoms was used to calculate the time elapsed since acute infection. |
| --- |

- 1. **COVID-19 record**

| **Episode** | **Date** |
| --- | --- |
| **Date of acute SARS-CoV-2 infection associated with the onset of persistent symptoms** | __ / __ / __ |

1. **Selected medical history and medication variables**
   1. **Medical history**

| **Has a physician ever told you that you have/had:** | **No** | **Yes** |
| --- | --- | --- |
| Hypertension | [ ] | [ ] |
| Diabetes mellitus | [ ] | [ ] |
| Cancer (excluding minor skin cancer) | [ ] | [ ] |
| Chronic obstructive pulmonary disease (COPD) | [ ] | [ ] |
| Asthma | [ ] | [ ] |

- 1. **Medication use**

| **Medication class** | **Current assessment** |
| --- | --- |
| **Antihypertensive drugs** | [ ] No [ ] Yes If yes, specify: __________ |
| **Lipid-lowering drugs** | [ ] No [ ] Yes If yes, specify: __________ |
| **Glucose-lowering drugs** | [ ] No [ ] Yes If yes, specify: __________ |

1. **Persistent symptoms relevant to LC and CFS diagnostic criteria**

| **Domain** | **Symptom item** | **Current assessment** |
| --- | --- | --- |
| **Systemic** | Fatigue | [ ] No [ ] Yes |
| **Systemic** | Lack of energy and/or general weakness | [ ] No [ ] Yes |
| **Neurocognitive** | Memory loss | [ ] No [ ] Yes |
| **Neurocognitive** | Difficulty concentrating | [ ] No [ ] Yes |
| **Respiratory / cardiovascular** | Dyspnea | [ ] No [ ] Yes |
| **Respiratory / cardiovascular** | Sore throat | [ ] No [ ] Yes |
| **Musculoskeletal** | Joint pain | [ ] No [ ] Yes |
| **Musculoskeletal** | Muscle pain | [ ] No [ ] Yes |
| **Neurological / neuromuscular** | Headache | [ ] No [ ] Yes |
| **Psychological / psychiatric** | Sleep disturbances | [ ] No [ ] Yes |
